# Supplementary material for: Electron-phonon coupling in topological surface states: The role of polar optical modes
Source: PubMed Central journal article supplement (PMC5430646; doi:10.1038/s41598-017-01128-1), 2017-04-24
Supplement: 41598_2017_1128_MOESM1_ESM.pdf [file 41598_2017_1128_MOESM1_ESM.pdf]

# Supplementary Information

## Electron-phonon coupling in topological surface states: The role of polar optical modes

Rolf Heid,<sup>1</sup> Irina Yu. Sklyadneva,<sup>2</sup> Evgueni V. Chulkov<sup>2,3,4,5</sup>

<sup>1</sup>Institut für Festkörperphysik, Karlsruher Institut für Technologie, D-76021 Karlsruhe,  
Germany

<sup>2</sup>Donostia International Physics Center (DIPC), 20018 San Sebastián/Donostia, Basque  
Country, Spain

<sup>3</sup>St. Petersburg State University, 199034, St. Petersburg, Russian Federation

<sup>4</sup>Departamento de Física de Materiales, Facultad de Ciencias Químicas, UPV/EHU, Apdo.  
1072, 20080 San Sebastián/Donostia, Basque Country, Spain

<sup>5</sup>Centro de Física de Materiales CFM - Materials Physics Center MPC, Centro Mixto  
CSIC-UPV/EHU, 20018 San Sebastián/Donostia, Basque Country, Spain

### Bulk lattice structure and phonons

The lattice structures of  $\text{Bi}_2\text{Se}_3$  and  $\text{Bi}_2\text{Te}_3$  consist of quintuple layers (QL) in the sequence Se/Te - Bi - Se/Te - Bi - Se/Te, separated by van der Waals (vdW) gaps. It is well known, that if one performs a full structural optimization, LDA/GGA functionals do not reproduce QL separation properly. We have therefore used experimental lattice constants taken from [1] and performed a relaxation of the internal structural parameters. Obtained values are collected in Table S1.

| Compound                 | $a_h(\text{Å})$ | $c_h(\text{Å})$ | $z(\text{Bi})$ | $z(\text{Se/Te})$ |         |
|--------------------------|-----------------|-----------------|----------------|-------------------|---------|
| $\text{Bi}_2\text{Se}_3$ | 4.1375          | 28.640          | 0.399          | 0.206             | exp     |
|                          |                 |                 | 0.4012         | 0.2094            | relaxed |
| $\text{Bi}_2\text{Te}_3$ | 4.3835          | 30.487          | 0.400          | 0.212             | exp     |
|                          |                 |                 | 0.4004         | 0.2084            | relaxed |

TABLE S1: Bulk structural parameters for  $\text{Bi}_2\text{Se}_3$  and  $\text{Bi}_2\text{Te}_3$ . Experimental values are taken from [1].

Frequencies of the  $\Gamma$  phonons calculated for these relaxed geometries are compared in Table S2 with previous theoretical and experimental studies.

|                                 | $A_{1g}^1$ | $A_{1g}^2$ | $E_g^1$ | $E_g^2$ | $A_{1u}^1$ | $A_{1u}^2$ | $E_u^1$ | $E_u^2$ | Reference                        |
|---------------------------------|------------|------------|---------|---------|------------|------------|---------|---------|----------------------------------|
| Bi <sub>2</sub> Se <sub>3</sub> | 8.9        | 21.5       | 5.0     | 16.4    | 17.0       | 20.2       | 9.8     | 15.9    | present work                     |
|                                 | 8.5        | 21.1       | 5.7     | 16.2    |            |            |         |         | Chis <i>et al.</i> [2]           |
|                                 | 9.36       | 21.2       | 5.15    | 17.0    | 17.0       | 20.0       | 9.96    | 16.2    | Cheng <i>et al.</i> [3]          |
|                                 | 9.0        | 21.9       |         | 16.3    |            |            |         |         | Chis <i>et al.</i> [2], 300 K    |
|                                 | 8.9        | 21.6       |         | 16.3    |            |            | 8.1     | 16.0    | Richter <i>et al.</i> [4], 300 K |
|                                 |            |            |         |         |            |            | 7.6     | 16.6    | Richter <i>et al.</i> [4], 15 K  |
|                                 | 9.1        | 21.76      | 4.84    | 16.46   | 16.06      | 19.85      | 8.44    | 15.5    | Gnezdilov <i>et al.</i> [5], 3 K |
| Bi <sub>2</sub> Te <sub>3</sub> | 7.8        | 16.4       | 4.9     | 12.6    | 12.05      | 15.1       | 7.6     | 11.6    | present work                     |
|                                 | 6.7        | 15.8       | 4.4     | 11.9    | 11.8       | 14.7       | 6.0     | 11.3    | Cheng <i>et al.</i> [3]          |
|                                 | 7.7        | 16.6       | 4.4     | 12.6    | 12.1       | 15.2       | 7.0     | 11.5    | Huang <i>et al.</i> [6]          |
|                                 | 7.8        | 16.6       |         | 12.8    | 11.7       | 14.9       | 6.2     | 11.8    | Richter <i>et al.</i> [4], 300 K |
|                                 |            |            |         |         | 10.9       | 14.1       | 6.0     | 12.2    | Richter <i>et al.</i> [4], 15 K  |
|                                 | 7.7        | 16.5       | 4.3     | 12.6    |            |            |         |         | Shalil <i>et al.</i> [7], 300 K  |

TABLE S2: Bulk phonon frequencies (in meV) at  $\Gamma$  from various theoretical and experimental works. The latter are indicated by the respective measurement temperature.

## Slab geometries and convergence tests

Periodic slabs were set up taking the relaxed QL blocks from bulk separated by the bulk vdW gap without further relaxation. For Bi<sub>2</sub>Se<sub>3</sub>, a slab consisting of 3QL was sufficient to reduce the gap at the Dirac point below 7 meV, while for Bi<sub>2</sub>Te<sub>3</sub> a 4 QL slab was needed. Large vacua of 11.0 Å and 12.3 Å separating the slabs perpendicular to the surface were chosen for Bi<sub>2</sub>Se<sub>3</sub> and Bi<sub>2</sub>Te<sub>3</sub>, respectively.

To test the robustness of our results for the electron-phonon coupling, we performed several calculations for Bi<sub>2</sub>Se<sub>3</sub> with varied geometries, using the 3QL slab as reference:

- (1) Vacuum size: increase of vacuum thickness from 11.0 Å to 31.7 Å.
- (2) Slab thickness: addition of another QL (3QL  $\rightarrow$  4QL)

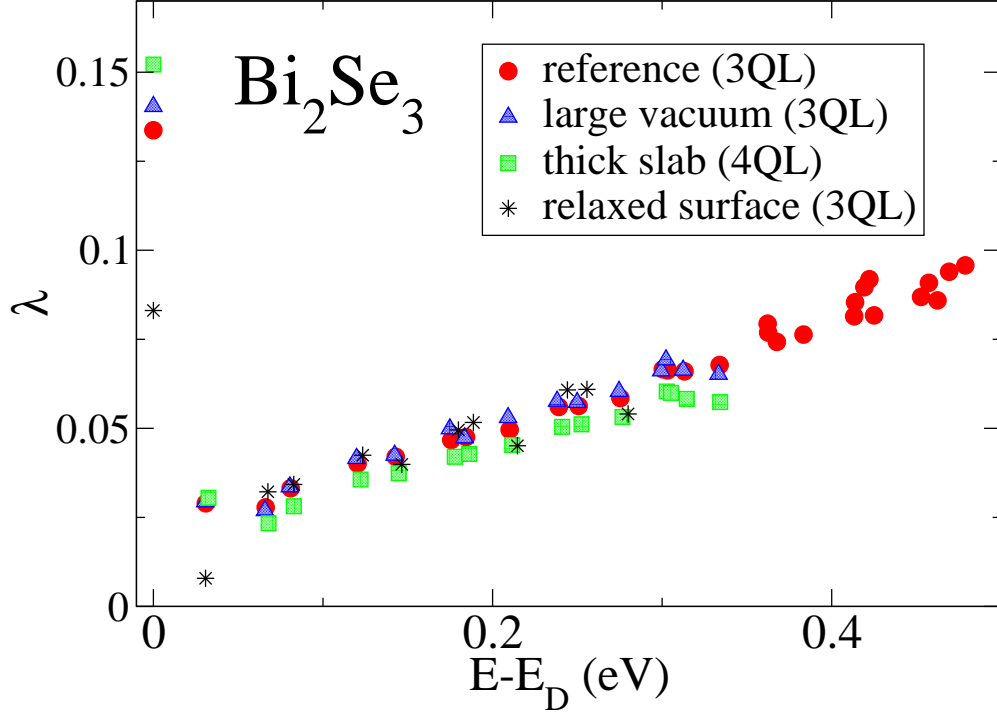

Figure S1: Coupling constants for  $\text{Bi}_2\text{Se}_3$  for different geometries (see text). The reference geometry denotes the unrelaxed 3QL slab with  $11.2\text{\AA}$  vacuum. All cases refer to small doping, where the Fermi energy lies in the upper part of the Dirac cone (Fig. 1a of main article).

- (3) Surface relaxation: we allowed the 4 outer layers on each side of the 3QL slab to relax freely. We obtained a general small outward relaxation, with changes in the the first 4 interlayer distances of 0.3%, 2.1%, 1.9%, and 2.0%. This small magnitude agrees with experimental findings, although details of the relaxation are still controversial.[8–10]

For the three different test geometries results for the coupling constants in the upper part of the Dirac cone are collected in Fig. S1. They are almost identical with the 3QL reference slab and demonstrate that our results are well converged with respect to the slab geometry.

- 
- [1] R. Wyckoff, *Crystal structures*, Crystal Structures No. Bd. 2 (Interscience Publishers, 1964).  
 [2] V. Chis, I. Y. Sklyadneva, K. A. Kokh, V. A. Volodin, O. E. Tereshchenko, and E. V. Chulkov, *Phys. Rev. B* **86**, 174304 (2012).  
 [3] W. Cheng and S.-F. Ren, *Phys. Rev. B* **83**, 094301 (2011).

- [4] W. Richter and C. R. Becker, *physica status solidi (b)* **84**, 619 (1977).
- [5] V. Gnezdilov, Y. G. Pashkevich, H. Berger, E. Pomjakushina, K. Conder, and P. Lemmens, *Phys. Rev. B* **84**, 195118 (2011).
- [6] G. Q. Huang, *EPL (Europhysics Letters)* **100**, 17001 (2012).
- [7] K. M. F. Shahil, M. Z. Hossain, D. Teweldebrhan, and A. A. Balandin, *Applied Physics Letters* **96**, 153103 (2010).
- [8] D. D. dos Reis, L. Barreto, M. Bianchi, G. A. S. Ribeiro, E. A. Soares, W. S. o. e. Silva, V. E. de Carvalho, J. Rawle, M. Hoesch, C. Nicklin, W. P. Fernandes, J. Mi, B. B. Iversen, and P. Hofmann, *Phys. Rev. B* **88**, 041404 (2013).
- [9] S. Roy, H. L. Meyerheim, A. Ernst, K. Mohseni, C. Tusche, M. G. Vergniory, T. V. Menshchikova, M. M. Otrokov, A. G. Ryabishchenkova, Z. S. Aliev, M. B. Babanly, K. A. Kokh, O. E. Tereshchenko, E. V. Chulkov, J. Schneider, and J. Kirschner, *Phys. Rev. Lett.* **113**, 116802 (2014).
- [10] M. V. Kuznetsov, L. V. Yashina, J. Sánchez-Barriga, I. I. Ogorodnikov, A. S. Vorokh, A. A. Volykhov, R. J. Koch, V. S. Neudachina, M. E. Tamm, A. P. Sirotina, A. Y. Varykhalov, G. Springholz, G. Bauer, J. D. Riley, and O. Rader, *Phys. Rev. B* **91**, 085402 (2015).
